# Supplementary material for: Disaster Preparedness and Awareness among University Students: A Structural Equation Analysis
Source: MDPI journal article supplement (doi:10.3390/ijerph20054447), 2023-03-02
Supplement: s1 [file s1]

## Disaster Preparedness Survey

### Demographic

1. Gender

- ☐ Male
- ☐ Female

2. Major

3. Which of the following best represent your racial or ethnic heritage?

- ☐ Native American
- ☐ African American
- ☐ American Indian or Alaska Native
- ☐ Asian
- ☐ Hispanic
- ☐ Native Hawaiian or Pacific Islander
- ☐ Other

4. What is your current year of education?

- ☐ Freshman
- ☐ Sophomore
- ☐ Junior
- ☐ Senior
- ☐ Masters
- ☐ Ph.D.

5. How do you travel to your university?

- ☐ Walking
- ☐ By Personal Vehicle
- ☐ By transit service provided by institution
- ☐ By public transport

6. How much time does it take for you to reach to your university?

- ☐ Less than 10 Minutes
- ☐ 10 - 20 Minutes
- ☐ 20 - 30 Minutes
- ☐ 30 - 60 Minutes
- ☐ More than an hour

7. Do you live off-campus or on-campus housing?

- ☐ Off - Campus
- ☐ On – Campus

8. Please identify your annual family income.

- ☐ Less than 15,000
- ☐ 15,000 to 30,000
- ☐ 30,000 to 60,000
- ☐ 60,000 to 100,000
- ☐ More than 100,000

### **Disaster Experience**

9. What type of disasters have you been involved in? If yes, please check all that apply.

- Hurricane
- Tornadoes
- Flooding
- Thunderstorms
- Earthquakes
- Tsunami
- None

10. Approximately how many disasters have you been involved in?

- ☐ 0 - 1
- ☐ 1 - 2
- ☐ 2 - 3
- ☐ 3 - 4
- ☐ 4 - 5
- ☐ More than 5

11. What was the maximum loss you suffered due to a disaster?

- Loss of a family member
- Loss of a friend
- Suffered physically
- Suffered mentally
- Did not suffer
- Don't want to answer

### Disaster Risk Reduction Education

Disaster risk reduction (DRR) is a systematic approach to identifying, assessing and reducing the risks of disaster. It aims to reduce socio-economic vulnerabilities to disaster as well as dealing with the environmental and other hazards that trigger them.

12. How important it is to include DRR education in your curriculum?

|                                                | Not at all Important     | Slightly Important       | Somewhat Important       | Moderately Important     | Very Important           | Quite Important          | Extremely Important      |
|------------------------------------------------|--------------------------|--------------------------|--------------------------|--------------------------|--------------------------|--------------------------|--------------------------|
| Importance of DRR being included in Curriculum | <input type="checkbox"/> |

13. Have you taken any DRR courses in the past? If yes, please specify at what level of education were you undergoing while taking DRR course.

- Elementary School
- Middle School
- High School
- Undergraduate
- Graduate
- Doctoral
- Other

14. How many disasters related courses were you taught during your pre-university education?

- 0 - 1
- 1 - 2
- 2 - 3
- 3 - 4
- 4 - 5
- More than 5

15. How willing are you to take a Disaster Risk Reduction course?

[illegible]

16. What form of DRR education do you think needs to be incorporated in your curriculum?

- ☐ Practical
- ☐ Theory
- ☐ Both Practical and Theory
- ☐ None

17. How often should DRR education be incorporated in your curriculum?

- ☐ Every semester
- ☐ Once a year
- ☐ Once every two years
- ☐ Once throughout the entire course
- ☐ None

18. Do you agree that having proper knowledge about the disaster would help you handle the loss due to the disaster?

- Extremely helpful
- Moderately helpful
- Slightly helpful
- Not helpful

## Emergency Awareness

19. How confident are you to assist with disaster management during emergency?

|                                                            | Not at all<br>Confident                                                             | Slightly<br>Confident                                                               | Somewhat<br>Confident                                                               | Moderately<br>Confident                                                             | Very<br>Confident                                                                     | Quite<br>Confident                                                                    | Extremely<br>Confident                                                                |
|------------------------------------------------------------|-------------------------------------------------------------------------------------|-------------------------------------------------------------------------------------|-------------------------------------------------------------------------------------|-------------------------------------------------------------------------------------|---------------------------------------------------------------------------------------|---------------------------------------------------------------------------------------|---------------------------------------------------------------------------------------|
| Confidence to assist<br>with disaster<br>management during |  |  |  |  |  |  |  |



25. If a severe natural disaster happens in the university, how impactful could it be in your life as a student?

|                            | Not at all Impactful     | Slightly Impactful       | Somewhat Impactful       | Moderately Impactful     | Very Impactful           | Quite Impactful          | Extremely Impactful      |
|----------------------------|--------------------------|--------------------------|--------------------------|--------------------------|--------------------------|--------------------------|--------------------------|
| Impact of Natural Disaster | <input type="checkbox"/> |

26. Does your university have a nursing department? If yes, does having a nursing department makes you confident regarding your university's preparedness of disaster?

- ☐ Yes it does
- ☐ No it does not
- ☐ My university does not have nursing department

27. In the case of emergency who is responsible for your safety, rank in order of importance.

|                     | Not at all Important     | Slightly Important       | Somewhat Important       | Moderately Important     | Very Important           | Quite Important          | Extremely Important      |
|---------------------|--------------------------|--------------------------|--------------------------|--------------------------|--------------------------|--------------------------|--------------------------|
| Myself              | <input type="checkbox"/> |
| Friends             | <input type="checkbox"/> |
| Parents             | <input type="checkbox"/> |
| University          | <input type="checkbox"/> |
| Government Agencies | <input type="checkbox"/> |

28. Do you think that the disaster would harm you less if you were at home when it attacked?

- ☐ Yes, my home is safer.
- ☐ Yes, my home is outside of the disaster area.
- ☐ No, my school is safer
- ☐ No, it does not make any difference
- ☐ I don't know

## Emergency Drills in University

29. How aware are you of the emergency procedures in your university?

|                                                       | Extremely Unaware        | Moderately Unaware       | Slightly Unaware         | Somewhat Aware           | Slightly Aware           | Moderately Aware         | Extremely Aware          |
|-------------------------------------------------------|--------------------------|--------------------------|--------------------------|--------------------------|--------------------------|--------------------------|--------------------------|
| Awareness for Emergency Procedures in Your University | <input type="checkbox"/> |

30. How well are you aware of the modes of communication system provided by your university during emergency?

|                                                               | Extremely Unaware        | Moderately Unaware       | Slightly Unaware         | Somewhat Aware           | Slightly Aware           | Moderately Aware         | Extremely Aware          |
|---------------------------------------------------------------|--------------------------|--------------------------|--------------------------|--------------------------|--------------------------|--------------------------|--------------------------|
| Awareness of communication system provided by your university | <input type="checkbox"/> |

31. Does your university have an online database regarding disaster preparedness?

|                                                                | Definitely not           | Definitely yes           | Probably yes             | Might or might not       | Probably not             |
|----------------------------------------------------------------|--------------------------|--------------------------|--------------------------|--------------------------|--------------------------|
| University has online database regarding disaster preparedness | <input type="checkbox"/> |

32. Was your university able to provide bulletin regarding an upcoming disaster? If yes, what was the medium of prediction?

- ☐ Email
- ☐ Class Announcement
- ☐ Did nothing, I came to know from other sources

33. How often are disaster drills are practiced in your university?

- ☐ Every semester
- ☐ Once a year
- ☐ Once every two years

- Once throughout the entire course
- Never

34. Does the DRR curriculum or disaster drill include knowledge regarding disaster medicine?

|                                                                            | Definitely yes           | Probably yes             | Might or might not       | Probably not             | Definitely not           |
|----------------------------------------------------------------------------|--------------------------|--------------------------|--------------------------|--------------------------|--------------------------|
| Curriculum or disaster drill include knowledge regarding disaster medicine | <input type="checkbox"/> |

35. Does the building where you attend classes have a disaster shelter?

|                                                         | Probably yes             | Might or might not       | Probably not             | Definitely not           | Definitely yes           |
|---------------------------------------------------------|--------------------------|--------------------------|--------------------------|--------------------------|--------------------------|
| Building where you attend class have a disaster shelter | <input type="checkbox"/> |

36. Does your university include your guardian while providing disaster preparedness education?

|                                                                             | Definitely yes           | Probably yes             | Might or might not       | Probably not             | Definitely not           |
|-----------------------------------------------------------------------------|--------------------------|--------------------------|--------------------------|--------------------------|--------------------------|
| University include guardian while providing disaster preparedness education | <input type="checkbox"/> |

37. Are you open to collaboration when it comes to handling a disaster?

|                                               | Definitely yes           | Probably yes             | Might or might not       | Probably not             | Definitely not           |
|-----------------------------------------------|--------------------------|--------------------------|--------------------------|--------------------------|--------------------------|
| Open to collaborate while handling a disaster | <input type="checkbox"/> |

### Implementation of DRR Courses

38. How important it is for the local entities to help universities to implement DRR courses?

|  | Quite Important | Extremely Important | Not at all Important | Slightly Important | Somewhat Important | Moderately Important | Very Important |
|--|-----------------|---------------------|----------------------|--------------------|--------------------|----------------------|----------------|
|--|-----------------|---------------------|----------------------|--------------------|--------------------|----------------------|----------------|

|                                                                          |                          |                          |                          |                          |                          |                          |                          |
|--------------------------------------------------------------------------|--------------------------|--------------------------|--------------------------|--------------------------|--------------------------|--------------------------|--------------------------|
| Importance of Local entities helping university to implement DRR Courses | <input type="checkbox"/> |
|--------------------------------------------------------------------------|--------------------------|--------------------------|--------------------------|--------------------------|--------------------------|--------------------------|--------------------------|

39. Does your university team up with experts at DRR forums to invite them to provide credible information to the students? If yes, what is the frequency?

- ☐ They never came
- ☐ They came once
- ☐ They come once a year
- ☐ They come once a semester
- ☐ I don't know

40. According to you what are the major barriers to learn DRR education?(Can mark multiple options)

- ☐ Not enough exposure to practical knowledge.
- ☐ Lack of previous exposure to disasters.
- ☐ Not enough disaster preparedness drills.
- ☐ Lack of direct engagement with local disaster management agency.
- ☐ Lack of knowledge in developing curriculum for disaster Education.
- ☐ Lack of trained staff in the university.
- ☐ Other please specify

41. Is taking course related to DRR preparedness mandatory in your university?

- ☐ Yes, it is mandatory
- ☐ No, it is not mandatory
- ☐ My university does not offer any courses

42. Do you agree that the education system should make DRR education mandatory?

|                                                            | Neither Agree nor Disagree | Somewhat Agree           | Agree                    | Strongly Agree           | Strongly Disagree        | Disagree                 | Somewhat Disagree        |
|------------------------------------------------------------|----------------------------|--------------------------|--------------------------|--------------------------|--------------------------|--------------------------|--------------------------|
| DRR education should be made mandatory by education system | <input type="checkbox"/>   | <input type="checkbox"/> | <input type="checkbox"/> | <input type="checkbox"/> | <input type="checkbox"/> | <input type="checkbox"/> | <input type="checkbox"/> |

43. Whom do you feel comfortable learning DRR education from?

- ☐ Professors
- ☐ University Staff
- ☐ Experienced Private Sector Professionals (With more than 10 years of experience)
- ☐ Experienced Government Sector Professionals (With more than 10 years of experience)

- All of the above

44. How likely would you give a test based on DRR education if it is in your curriculum.

|                                                  | Moderately unlikely                                                               | Slightly unlikely                                                                 | Neither likely nor unlikely                                                       | Slightly likely                                                                   | Moderately likely                                                                   | Extremely likely                                                                    | Extremely unlikely                                                                  |
|--------------------------------------------------|-----------------------------------------------------------------------------------|-----------------------------------------------------------------------------------|-----------------------------------------------------------------------------------|-----------------------------------------------------------------------------------|-------------------------------------------------------------------------------------|-------------------------------------------------------------------------------------|-------------------------------------------------------------------------------------|
| Likelihood of giving test based on DRR education |  |  |  |  |  |  |  |
